# Supplementary material for: In situ formation of chloroform for dispersive liquid–liquid microextraction of some aromatic amines from aqueous samples optimized by central composite design prior to GC-MS analysis
Source: Royal Society of Chemistry journal article supplement (doi:10.1039/d3ay00141e), 2023-01-01
Supplement: d3ay00141e1.pdf [file d3ay00141e1.pdf]

### Supplementary data

#### **In-situ formation of chloroform for dispersive liquid liquidmicroextraction of some aromatic amines from aqueous samples optimized by central composite design prior to GC-MS analysis**

Shabnam Shagagipour<sup>1</sup>, Saeed Mohammad Sorouraddin<sup>1,\*</sup>, Mir Ali Farajzadeh<sup>1,2</sup>, Mohammad Reza Afshar Mogaddam<sup>3,4,\*</sup>

<sup>1</sup> *Department of Analytical Chemistry, Faculty of Chemistry, University of Tabriz, Tabriz, Iran*

<sup>2</sup> *Engineering Faculty, Near East University, 99138 Nicosia, North Cyprus, Mersin 10, Turkey*

<sup>3</sup> *Food and Drug Safety Research Center, Tabriz University of Medical Sciences, Tabriz, Iran*

<sup>4</sup> *Pharmaceutical Analysis Research Center, Tabriz University of Medical Sciences, Tabriz Iran*

\*Corresponding author: Dr. S. M. Sorouraddin

Tel.: +98 41 33393110, Fax: +98 41 33334019

E-mail addresses: saied\_sorour@yahoo.com; ssorureddin@tabrizu.ac.ir

\*Corresponding author: Dr. M.R. Afshar Mogaddam

Tel.: +98 41 31773323, Fax: +98 41 31773333

E-mail addresses: mr.afsharmogaddam@yahoo.com; Afsharmogaddam@tbzmed.ac.ir

Table S1. Experimental factors, levels, and results for CCD design.

| Variables                                     |     |      |     |     |      | levels                                                        |             |                 |               |           |
|-----------------------------------------------|-----|------|-----|-----|------|---------------------------------------------------------------|-------------|-----------------|---------------|-----------|
|                                               |     |      |     |     |      | $-\alpha$                                                     | -1          | 0               | +1            | $+\alpha$ |
| (A) Vortex time (min)                         |     |      |     |     |      | 1                                                             | 3.3         | 5.5             | 7.8           | 10        |
| (B) Chloral hydrate (mg)                      |     |      |     |     |      | 140                                                           | 180         | 220             | 260           | 300       |
| (C) NaCl concentration (% w/v)                |     |      |     |     |      | 0                                                             | 2.5         | 5.0             | 7.5           | 10        |
| (D) NaOH concentration (mol L <sup>-1</sup> ) |     |      |     |     |      | 0.5                                                           | 0.75        | 1.0             | 1.25          | 1.5       |
| Std                                           | Run | A    | B   | C   | D    | Average ER (%) obtained from three repeated determinations of |             |                 |               |           |
|                                               |     |      |     |     |      | Aniline                                                       | 4-Toluidine | 1-Naphthylamine | Diphenylamine |           |
| 16                                            | 1   | 7.8  | 260 | 7.5 | 1.25 | 48.6                                                          | 52.9        | 48.2            | 53.3          |           |
| 27                                            | 2   | 5.5  | 220 | 5   | 1    | 49.1                                                          | 53.5        | 48.7            | 53.9          |           |
| 28                                            | 3   | 5.5  | 220 | 5   | 1    | 49.0                                                          | 53.5        | 48.6            | 53.9          |           |
| 17                                            | 4   | 1.0  | 220 | 5   | 1    | 52.9                                                          | 57.7        | 52.5            | 58.2          |           |
| 7                                             | 5   | 3.3  | 260 | 7.5 | 0.75 | 45.4                                                          | 49.5        | 45.0            | 49.8          |           |
| 30                                            | 6   | 5.5  | 220 | 5   | 1    | 44.8                                                          | 48.8        | 44.4            | 49.2          |           |
| 9                                             | 7   | 3.3  | 180 | 2.5 | 1.25 | 56.6                                                          | 61.6        | 56.1            | 62.1          |           |
| 29                                            | 8   | 5.5  | 220 | 5   | 1    | 49.0                                                          | 53.5        | 48.6            | 53.9          |           |
| 19                                            | 9   | 5.5  | 140 | 5   | 1    | 52.2                                                          | 57.0        | 51.8            | 57.4          |           |
| 22                                            | 10  | 5.5  | 220 | 10  | 1    | 52.8                                                          | 57.6        | 52.4            | 58.0          |           |
| 21                                            | 11  | 5.5  | 220 | 0   | 1    | 68.7                                                          | 74.9        | 68.1            | 75.4          |           |
| 23                                            | 12  | 5.5  | 220 | 5   | 0.5  | 76.1                                                          | 83.0        | 75.5            | 83.6          |           |
| 15                                            | 13  | 3.3  | 260 | 7.5 | 1.25 | 68.2                                                          | 74.3        | 67.6            | 74.9          |           |
| 20                                            | 14  | 5.5  | 300 | 5   | 1    | 47.2                                                          | 51.5        | 46.8            | 51.9          |           |
| 5                                             | 15  | 3.3  | 180 | 7.5 | 0.75 | 55.4                                                          | 60.4        | 55.0            | 60.9          |           |
| 2                                             | 16  | 7.8  | 180 | 2.5 | 0.75 | 83.0                                                          | 90.4        | 82.3            | 91.1          |           |
| 13                                            | 17  | 3.3  | 180 | 7.5 | 1.25 | 55.5                                                          | 60.5        | 55.1            | 61.0          |           |
| 11                                            | 18  | 3.3  | 260 | 2.5 | 1.25 | 70.6                                                          | 77.0        | 70.1            | 77.6          |           |
| 14                                            | 19  | 7.8  | 180 | 7.5 | 1.25 | 41.4                                                          | 45.1        | 41.0            | 45.4          |           |
| 24                                            | 20  | 5.5  | 220 | 5   | 1.5  | 69.9                                                          | 76.2        | 69.3            | 76.8          |           |
| 3                                             | 21  | 3.3  | 260 | 2.5 | 0.75 | 50.3                                                          | 54.8        | 49.9            | 55.2          |           |
| 26                                            | 22  | 5.5  | 220 | 5   | 1    | 44.8                                                          | 48.9        | 44.5            | 49.2          |           |
| 25                                            | 23  | 5.5  | 220 | 5   | 1    | 44.8                                                          | 48.8        | 44.4            | 49.2          |           |
| 4                                             | 24  | 7.8  | 260 | 2.5 | 0.75 | 57.8                                                          | 63.0        | 57.3            | 63.4          |           |
| 10                                            | 25  | 7.8  | 180 | 2.5 | 1.25 | 53.8                                                          | 58.6        | 53.4            | 59.1          |           |
| 1                                             | 26  | 3.3  | 180 | 2.5 | 0.75 | 67.1                                                          | 73.1        | 66.6            | 73.7          |           |
| 18                                            | 27  | 10.0 | 220 | 5   | 1    | 47.7                                                          | 52.0        | 47.3            | 52.4          |           |
| 6                                             | 28  | 7.8  | 180 | 7.5 | 0.75 | 69.1                                                          | 2 75.3      | 68.5            | 75.8          |           |
| 8                                             | 29  | 7.8  | 260 | 7.5 | 0.75 | 46.9                                                          | 51.1        | 46.5            | 51.5          |           |
| 12                                            | 30  | 7.8  | 260 | 2.5 | 1.25 | 54.3                                                          | 59.1        | 53.8            | 59.6          |           |

Table S2. Final equations for the ER of analytes in terms of coded factors.

| Analytes        | Final equations                                                                                                             |
|-----------------|-----------------------------------------------------------------------------------------------------------------------------|
| Aniline         | $ER (\%)=Y = 46.93 -1.04 A - 2.08 B -3.95 C -1.6 D - 2.48 AB - 1.43 AC - 5.71 AD +6.79 BD +1.23 CD + 3.34 C^2 + 6.40 D^2$   |
| 4-Toluidine     | $ER (\%)=Y = 51.15 -1.13 A - 2.26 B -4.30 C -1.75 D - 2.70 AB - 1.56 AC - 6.23 AD +7.40 BD +1.34 CD + 3.64 C^2 + 6.98 D^2$  |
| 1-Naphthylamine | $ER (\%)=Y = 46.55 -1.03 A - 2.06 B -3.91 C -1.59 D - 2.46 AB - 1.42 AC - 5.67 AD +6.74 BD +1.22 CD + 3.31 C^2 + 6.35 D^2$  |
| Diphenylamine   | $ER (\%)=Y = 51.55 -1.14 A - 2.28 B -4.330 C -1.76 D - 2.72 AB - 1.57 AC - 6.28 AD +7.46 BD +1.35 CD + 3.66 C^2 + 7.03 D^2$ |

Table S3. Results of ANOVA for CCD design for aniline.

| Source                   | Sum of Squares | d <sub>f</sub> | Mean Square | F-value | p-value  |                 |
|--------------------------|----------------|----------------|-------------|---------|----------|-----------------|
| <b>Model</b>             | 3299.19        | 14             | 235.66      | 66.35   | < 0.0001 | Significant     |
| A-Vortex time            | 25.86          | 1              | 25.86       | 7.28    | 0.0165   |                 |
| B-Chloral hydrate amount | 103.61         | 1              | 103.61      | 29.17   | < 0.0001 |                 |
| C-Salt effect            | 373.64         | 1              | 373.64      | 105.20  | < 0.0001 |                 |
| D-NaOH concentration     | 61.53          | 1              | 61.53       | 17.32   | 0.0008   |                 |
| AB                       | 98.06          | 1              | 98.06       | 27.61   | < 0.0001 |                 |
| AC                       | 32.75          | 1              | 32.75       | 9.22    | 0.0083   |                 |
| AD                       | 522.53         | 1              | 522.53      | 147.13  | < 0.0001 |                 |
| BC                       | 14.39          | 1              | 14.39       | 4.05    | 0.0625   |                 |
| BD                       | 737.70         | 1              | 737.70      | 207.71  | < 0.0001 |                 |
| CD                       | 24.35          | 1              | 24.35       | 6.86    | 0.0194   |                 |
| A <sup>2</sup>           | 14.55          | 1              | 14.55       | 4.10    | 0.0611   |                 |
| B <sup>2</sup>           | 9.23           | 1              | 9.23        | 2.60    | 0.1278   |                 |
| C <sup>2</sup>           | 305.29         | 1              | 305.29      | 85.96   | < 0.0001 |                 |
| D <sup>2</sup>           | 1123.98        | 1              | 1123.98     | 316.47  | < 0.0001 |                 |
| <b>Residual</b>          | 53.27          | 15             | 3.55        |         |          |                 |
| Lack of Fit              | 25.82          | 10             | 2.58        | 0.4701  | 0.8550   | Not significant |
| Pure Error               | 27.46          | 5              | 5.49        |         |          |                 |
| <b>Cor Total</b>         | 3352.46        | 29             |             |         |          |                 |

Table S4. Results of ANOVA for CCD design for 4-toluidine.

| Source                   | Sum of Squares | df | Mean Square | F-value | p-value  |                 |
|--------------------------|----------------|----|-------------|---------|----------|-----------------|
| <b>Model</b>             | 3919.76        | 14 | 279.98      | 66.35   | < 0.0001 | Significant     |
| A-Vortex time            | 30.73          | 1  | 30.73       | 7.28    | 0.0165   |                 |
| B-Chloral hydrate amount | 123.10         | 1  | 123.10      | 29.17   | < 0.0001 |                 |
| C-Salt effect            | 443.92         | 1  | 443.92      | 105.20  | < 0.0001 |                 |
| D-NaOH concentration     | 73.10          | 1  | 73.10       | 17.32   | 0.0008   |                 |
| AB                       | 116.50         | 1  | 116.50      | 27.61   | < 0.0001 |                 |
| AC                       | 38.91          | 1  | 38.91       | 9.22    | 0.0083   |                 |
| AD                       | 620.82         | 1  | 620.82      | 147.13  | < 0.0001 |                 |
| BC                       | 17.09          | 1  | 17.09       | 4.05    | 0.0625   |                 |
| BD                       | 876.46         | 1  | 876.46      | 207.71  | < 0.0001 |                 |
| CD                       | 28.93          | 1  | 28.93       | 6.86    | 0.0194   |                 |
| A <sup>2</sup>           | 17.29          | 1  | 17.29       | 4.10    | 0.0611   |                 |
| B <sup>2</sup>           | 10.96          | 1  | 10.96       | 2.60    | 0.1278   |                 |
| C <sup>2</sup>           | 362.71         | 1  | 362.71      | 85.96   | < 0.0001 |                 |
| D <sup>2</sup>           | 1335.40        | 1  | 1335.40     | 316.47  | < 0.0001 |                 |
| <b>Residual</b>          | 63.29          | 15 | 4.22        |         |          |                 |
| Lack of Fit              | 30.67          | 10 | 3.07        | 0.4701  | 0.8550   | Not significant |
| Pure Error               | 32.62          | 5  | 6.52        |         |          |                 |
| <b>Cor Total</b>         | 3983.06        | 29 |             |         |          |                 |

Table S5. Results of ANOVA for CCD design for 1-naphthylamine.

| Source                   | Sum of Squares | df | Mean Square | F-value | p-value  |                 |
|--------------------------|----------------|----|-------------|---------|----------|-----------------|
| <b>Model</b>             | 3245.96        | 14 | 231.85      | 66.35   | < 0.0001 | Significant     |
| A-Vortex time            | 25.45          | 1  | 25.45       | 7.28    | 0.0165   |                 |
| B-Chloral hydrate amount | 101.94         | 1  | 101.94      | 29.17   | < 0.0001 |                 |
| C-Salt effect            | 367.61         | 1  | 367.61      | 105.20  | < 0.0001 |                 |
| D-NaOH concentration     | 60.54          | 1  | 60.54       | 17.32   | 0.0008   |                 |
| AB                       | 96.48          | 1  | 96.48       | 27.61   | < 0.0001 |                 |
| AC                       | 32.22          | 1  | 32.22       | 9.22    | 0.0083   |                 |
| AD                       | 514.10         | 1  | 514.10      | 147.13  | < 0.0001 |                 |
| BC                       | 14.15          | 1  | 14.15       | 4.05    | 0.0625   |                 |
| BD                       | 725.80         | 1  | 725.80      | 207.71  | < 0.0001 |                 |
| CD                       | 23.96          | 1  | 23.96       | 6.86    | 0.0194   |                 |
| A <sup>2</sup>           | 14.32          | 1  | 14.32       | 4.10    | 0.0611   |                 |
| B <sup>2</sup>           | 9.08           | 1  | 9.08        | 2.60    | 0.1278   |                 |
| C <sup>2</sup>           | 300.36         | 1  | 300.36      | 85.96   | < 0.0001 |                 |
| D <sup>2</sup>           | 1105.85        | 1  | 1105.85     | 316.47  | < 0.0001 |                 |
| <b>Residual</b>          | 52.41          | 15 | 3.49        |         |          |                 |
| Lack of Fit              | 25.40          | 10 | 2.54        | 0.4701  | 0.8550   | Not significant |
| Pure Error               | 27.02          | 5  | 5.40        |         |          |                 |
| <b>Cor Total</b>         | 3298.37        | 29 |             |         |          |                 |

Table S6. Results of ANOVA for CCD design for diphenylamine.

| Source                   | Sum of Squares | df | Mean Square | F-value | p-value  |                 |
|--------------------------|----------------|----|-------------|---------|----------|-----------------|
| <b>Model</b>             | 3980.13        | 14 | 284.29      | 66.35   | < 0.0001 | Significant     |
| A-Vortex time            | 31.20          | 1  | 31.20       | 7.28    | 0.0165   |                 |
| B-Chloral hydrate amount | 125.00         | 1  | 125.00      | 29.17   | < 0.0001 |                 |
| C-Salt effect            | 450.76         | 1  | 450.76      | 105.20  | < 0.0001 |                 |
| D-NaOH concentration     | 74.23          | 1  | 74.23       | 17.32   | 0.0008   |                 |
| AB                       | 118.30         | 1  | 118.30      | 27.61   | < 0.0001 |                 |
| AC                       | 39.51          | 1  | 39.51       | 9.22    | 0.0083   |                 |
| AD                       | 630.38         | 1  | 630.38      | 147.13  | < 0.0001 |                 |
| BC                       | 17.36          | 1  | 17.36       | 4.05    | 0.0625   |                 |
| BD                       | 889.96         | 1  | 889.96      | 207.71  | < 0.0001 |                 |
| CD                       | 29.37          | 1  | 29.37       | 6.86    | 0.0194   |                 |
| A <sup>2</sup>           | 17.56          | 1  | 17.56       | 4.10    | 0.0611   |                 |
| B <sup>2</sup>           | 11.13          | 1  | 11.13       | 2.60    | 0.1278   |                 |
| C <sup>2</sup>           | 368.30         | 1  | 368.30      | 85.96   | < 0.0001 |                 |
| D <sup>2</sup>           | 1355.97        | 1  | 1355.97     | 316.47  | < 0.0001 |                 |
| <b>Residual</b>          | 64.27          | 15 | 4.28        |         |          |                 |
| Lack of Fit              | 31.14          | 10 | 3.11        | 0.4701  | 0.8550   | Not significant |
| Pure Error               | 33.13          | 5  | 6.63        |         |          |                 |
| <b>Cor Total</b>         | 4044.40        | 29 |             |         |          |                 |

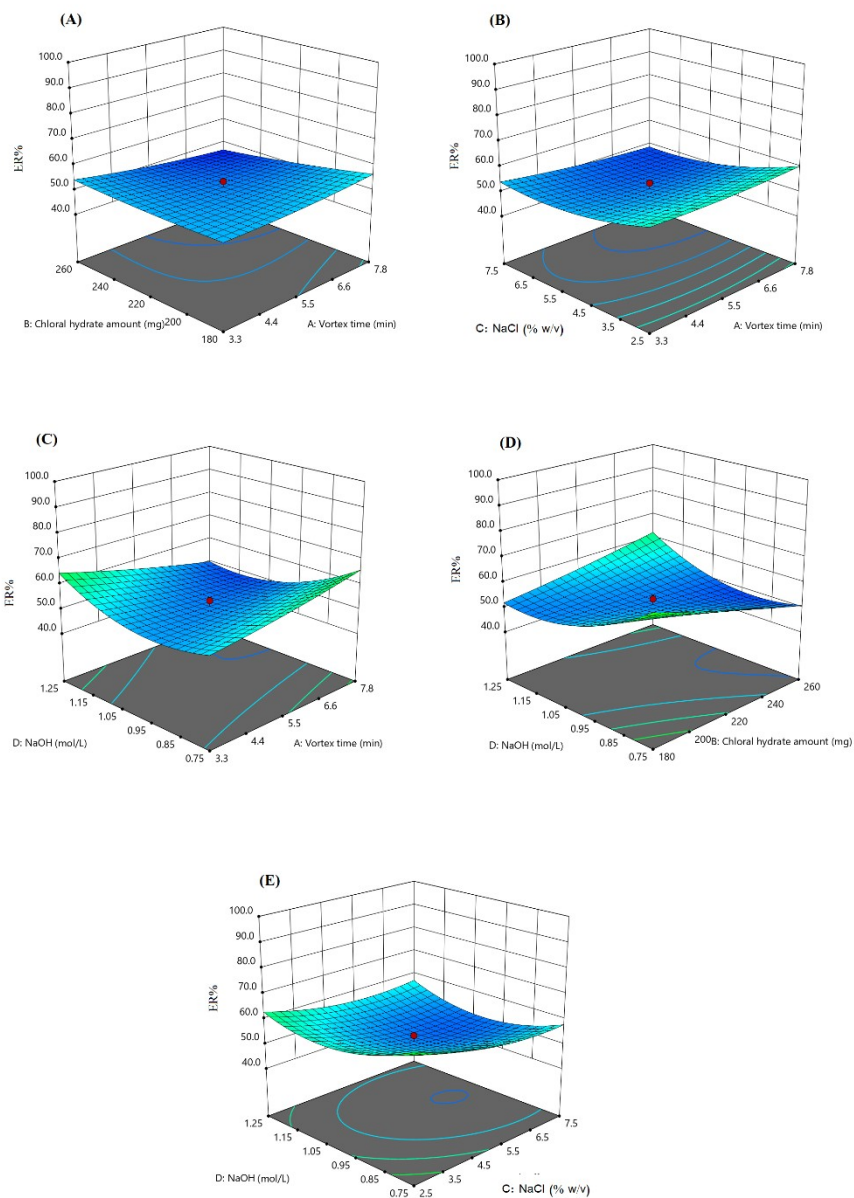

**Fig. S1.** Response surface and contour plots for 4-toluidine using CCD.

(A) Chloral hydrate amount (mg) vs vortex time (min); (B) salt concentration (% w/v) vs vortex time (min); (C) NaOH concentration ( $\text{mol L}^{-1}$ ) vs vortex time (min); (D) NaOH concentration ( $\text{mol L}^{-1}$ ) vs chloral hydrate amount (mg), and (E) NaOH concentration ( $\text{mol L}^{-1}$ ) vs salt concentration (% w/v).



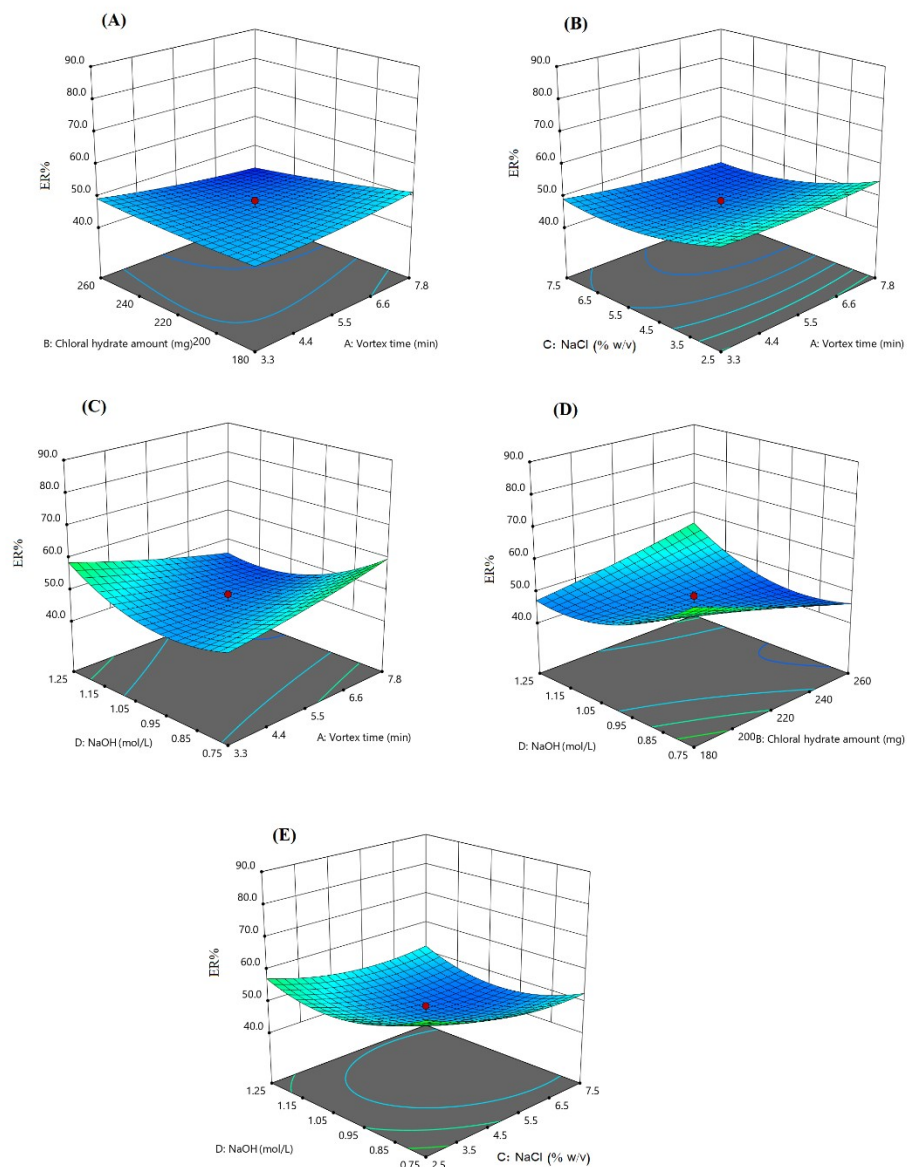

**Fig. S2.** Response surface and contour plots for 1-naphthylamine using CCD.

(A) Chloral hydrate amount (mg) vs vortex time (min); (B) salt concentration (% w/v) vs vortex time (min); (C) NaOH concentration ( $\text{mol L}^{-1}$ ) vs vortex time (min); (D) NaOH concentration ( $\text{mol L}^{-1}$ ) vs chloral hydrate amount (mg), and (E) NaOH concentration ( $\text{mol L}^{-1}$ ) vs salt concentration (% w/v).

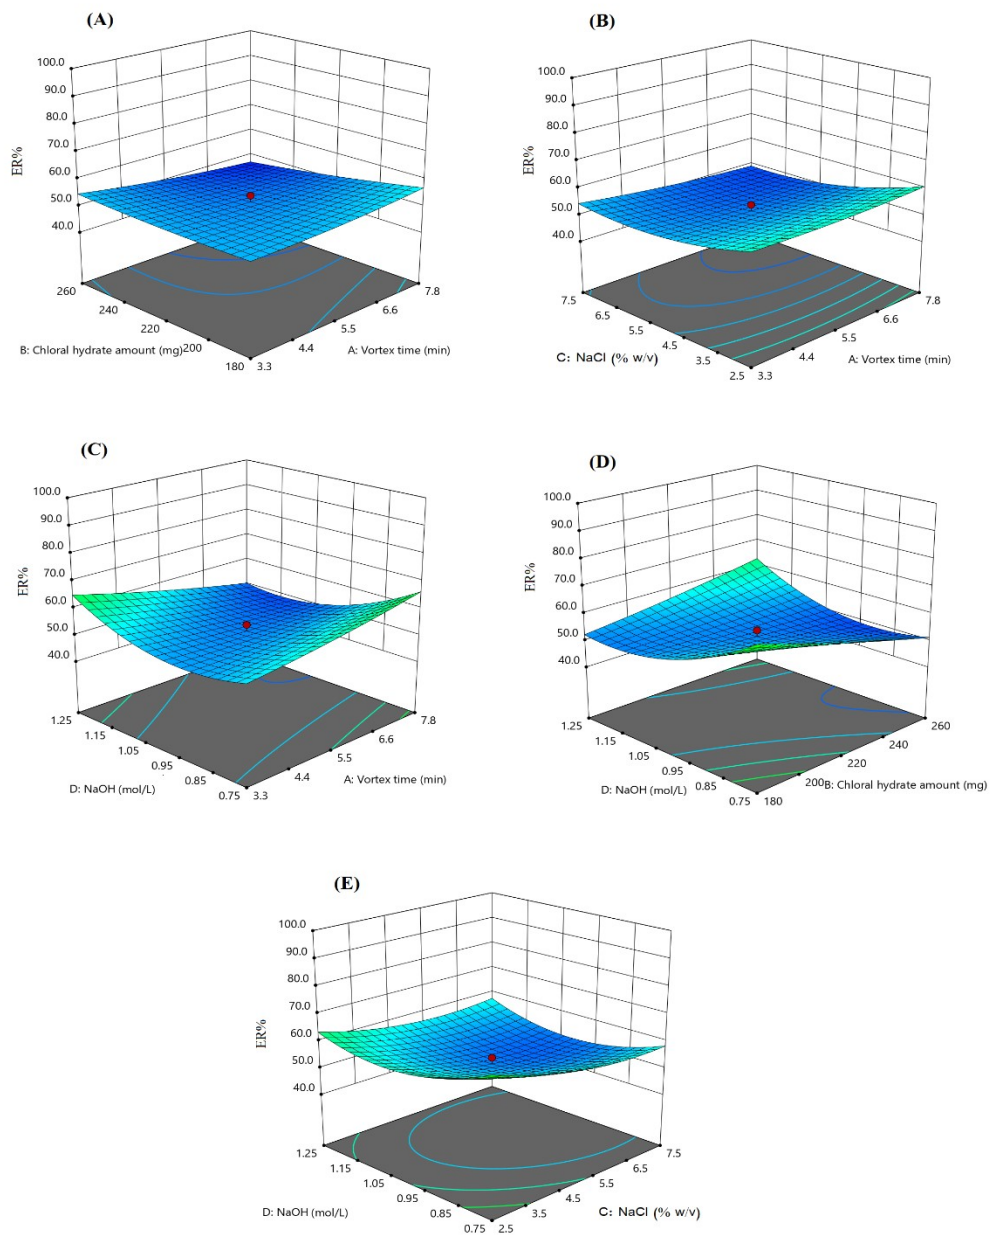

**Fig. S3.** Response surface and contour plots for diphenylamine using CCD.

(A) Chloral hydrate amount (mg) vs vortex time (min); (B) salt concentration (% w/v) vs vortex time (min); (C) NaOH concentration ( $\text{mol L}^{-1}$ ) vs vortex time (min); (D) NaOH concentration ( $\text{mol L}^{-1}$ ) vs chloral hydrate amount (mg), and (E) NaOH concentration ( $\text{mol L}^{-1}$ ) vs salt concentration (% w/v).
